# Supplementary material
Source: PubMed Central journal article supplement (PMC6796935)
Supplement: 41422_2019_214_MOESM3_ESM.pdf [file 41422_2019_214_MOESM3_ESM.pdf]

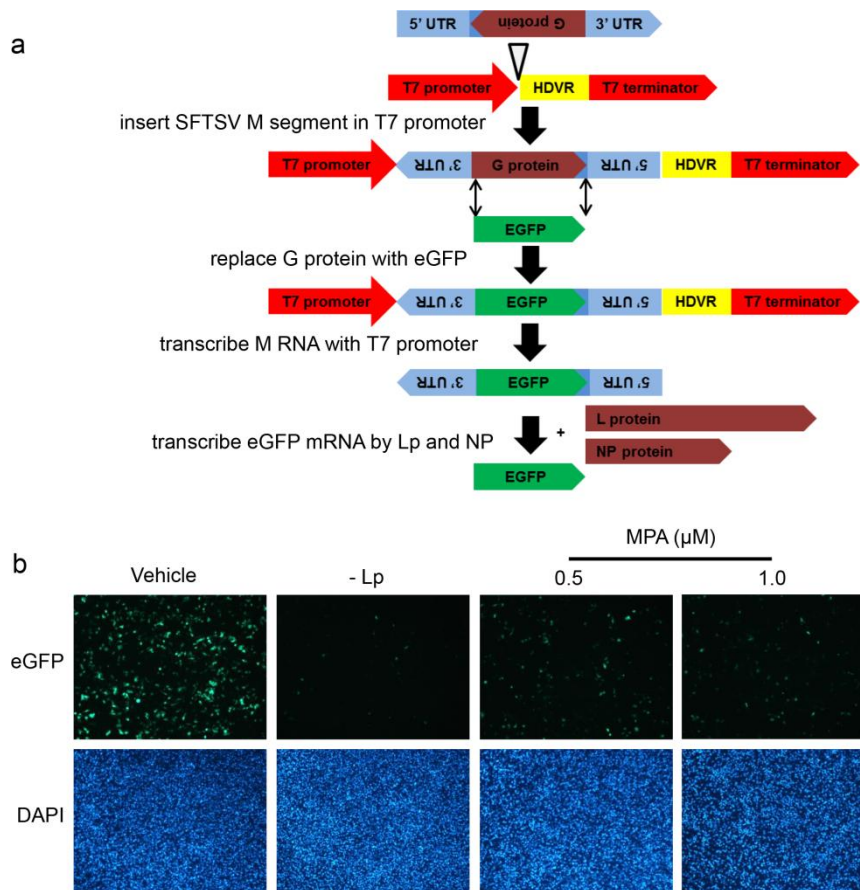

**Fig. S3. Construction of SFTSV mini-genome system.** (a) Schematic diagram of the RNA polymerase T7 transcription plasmid and the generation of chimeric SFTSV virus-reporter RNA segment (MG system). (b) Inhibition of SFTSV MG-activity by mycophenolic acid (MPA), a non-nucleoside, noncompetitive, reversible inhibitor of eukaryotic IMP dehydrogenase. BSRT7 cells were transfected with SFTSV MG system reporter plasmid and the plasmids expressing NP and L proteins, and then treated with MPA with the indicated concentrations. The images of eGFP expression (representing MG activity) was acquired at 24 hours post transfection. Vehicle: DMSO treated; -Lp: transfection without L plasmid.
