# Supplementary material
Source: PubMed Central journal article supplement (PMC6796935)
Supplement: 41422_2019_214_MOESM4_ESM.pdf [file 41422_2019_214_MOESM4_ESM.pdf]

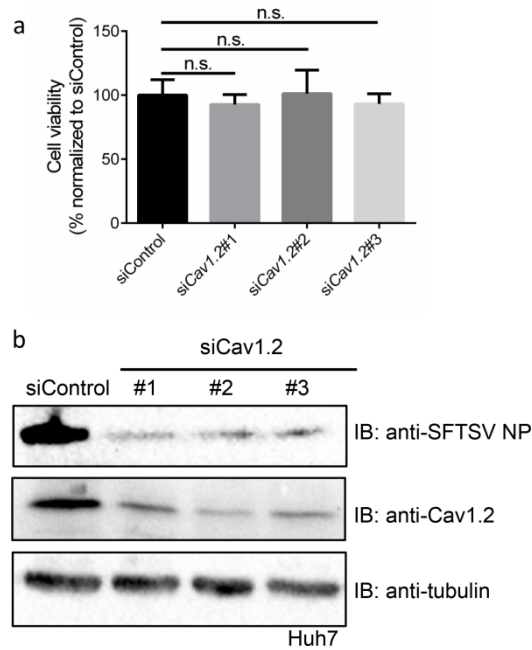

**Fig. S4. Relative intracellular SFTSV NP level in SFTSV infected Huh7 cells. (a)** Effects of siRNAs on cell viability. Cells were transfected with siRNA against L-type calcium channel  $Ca_v1.2$  (siCa<sub>v</sub>1.2) or scramble siRNA (siControl) for 48 hours and subjected to MTT analysis. n.s., not significant. **(b)** Cells were transfected with siRNA against L-type calcium channel  $Ca_v1.2$  for 48 hours and then infected with SFTSV (MOI = 0.5) for 24 hours followed by Western blot analysis with NP,  $Ca_v1.2$  and tubulin antibodies.
