# Supplementary material
Source: PubMed Central journal article supplement (PMC6796935)
Supplement: 41422_2019_214_MOESM6_ESM.pdf [file 41422_2019_214_MOESM6_ESM.pdf]

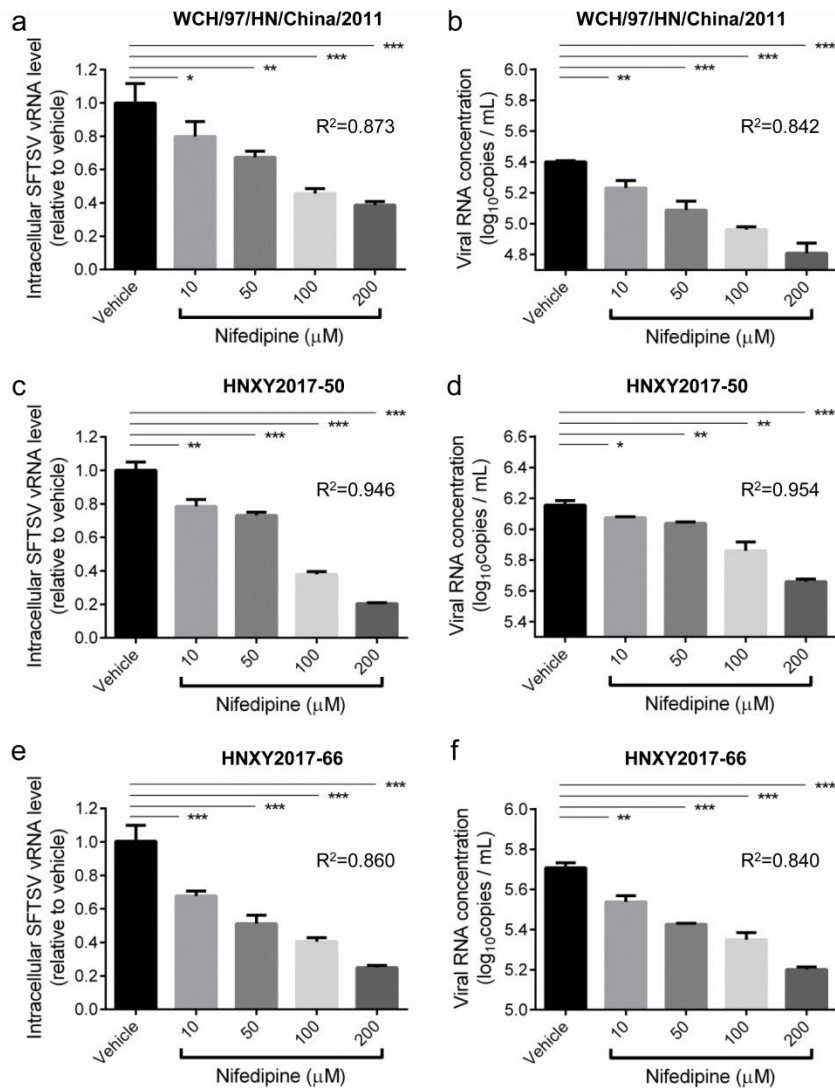

**Fig. S6. *In vitro* inhibition effect of nifedipine on different strains of SFTSV.** Vero cells were treated with nifedipine or vehicle (DMSO), and infected with SFTSV strain WCH, HNX2017-50, or HNX2017-66 (MOI = 1). At 36 hours post infection (p.i.), the intracellular and supernatant viral RNA was measured with quantitative RT-PCR. Effects of nifedipine on intracellular and supernatant vRNA of SFTSV WCH (a and b), SFTSV HNX2017-50 (c and d) and SFTSV HNX2017-66 (e and f) were indicated. Comparison of mean values between drug treated group and vehicle group was performed by student's *t* test. \*  $P < 0.05$ ; \*\*  $P < 0.01$ ; \*\*\*  $P < 0.001$ .  $R^2$  was estimated by nonlinear regression model (curve fit).
