# Supplementary material
Source: PubMed Central journal article supplement (PMC6796935)
Supplement: 41422_2019_214_MOESM7_ESM.pdf [file 41422_2019_214_MOESM7_ESM.pdf]

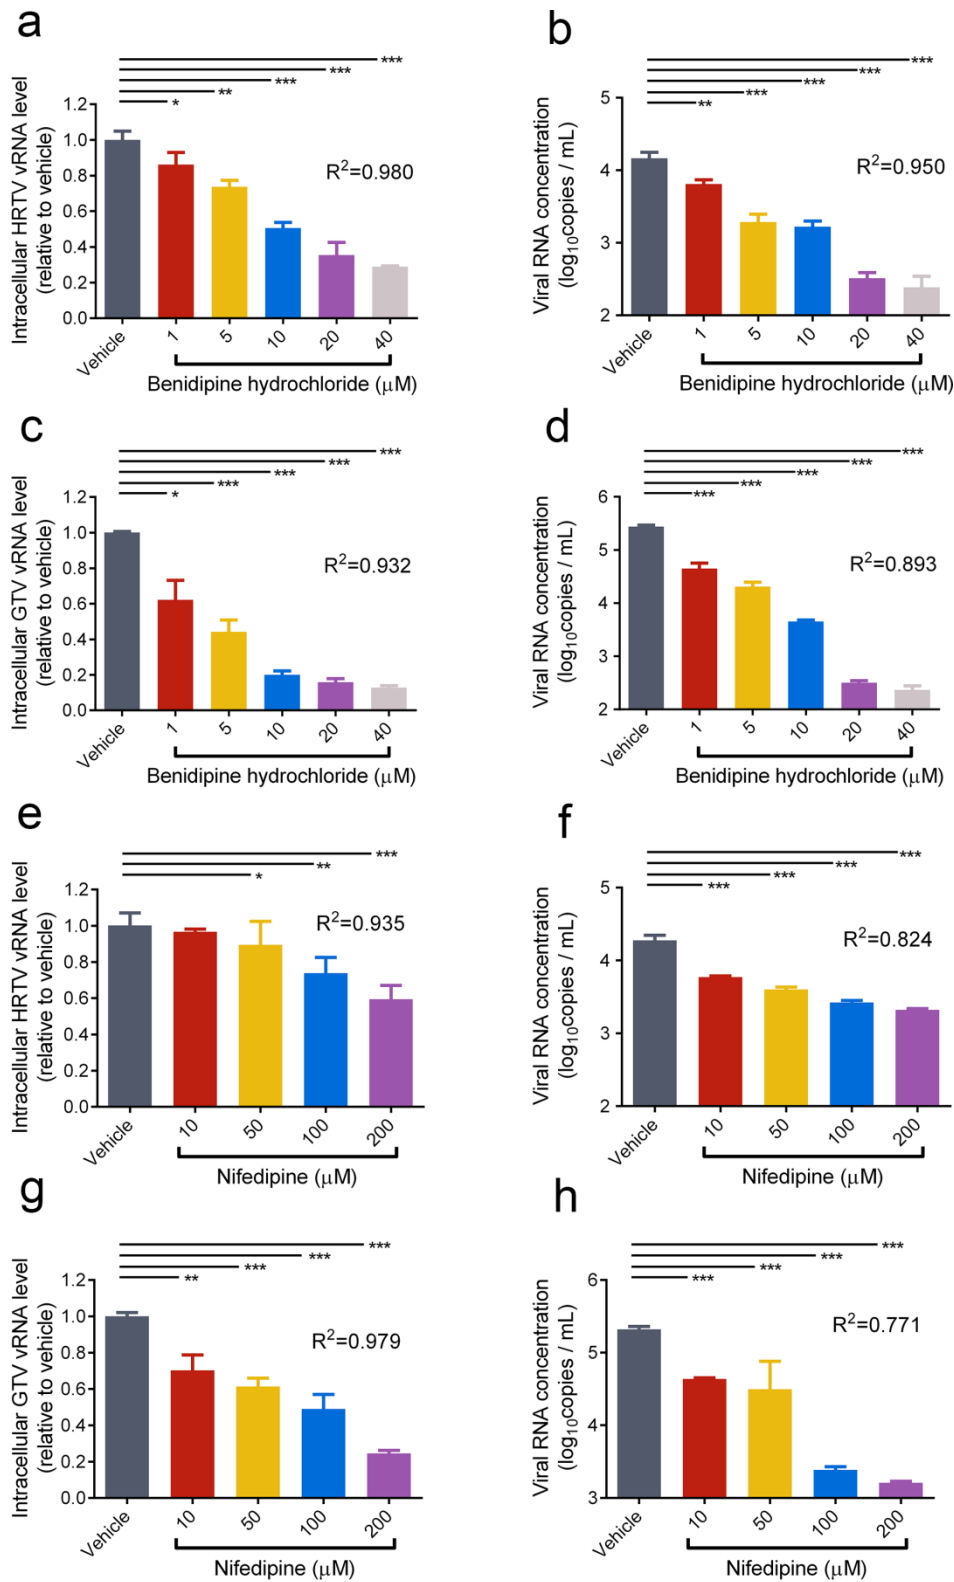

**Fig. S7. *In vitro* inhibition effect of benidipine hydrochloride and nifedipine on HRTV and GTV.** Vero cells were treated with benidipine hydrochloride or nifedipine or vehicle (DMSO) with indicated concentrations and infected with HRTV (MOI =

0.2) or GTV (MOI = 0.2). At 36 hours post infection (p.i.), the intracellular and supernatant viral RNA was measured with quantitative RT-PCR. Effects of benidipine hydrochloride on intracellular and supernatant vRNA of HRTV (**a** and **b**) and GTV (**c** and **d**); effect of nifedipine on intracellular RNA and supernatant RNA of HRTV (**e** and **f**) and GTV (**g** and **h**). Comparison of mean values between drug treated group and vehicle (DMSO) group was performed by student's *t* test. \**P* < 0.05; \*\**P* < 0.01; \*\*\**P* < 0.001.  $R^2$  was estimated by nonlinear regression model (curve fit).
