# Supplementary material
Source: PubMed Central journal article supplement (PMC6796935)
Supplement: 41422_2019_214_MOESM8_ESM.pdf [file 41422_2019_214_MOESM8_ESM.pdf]

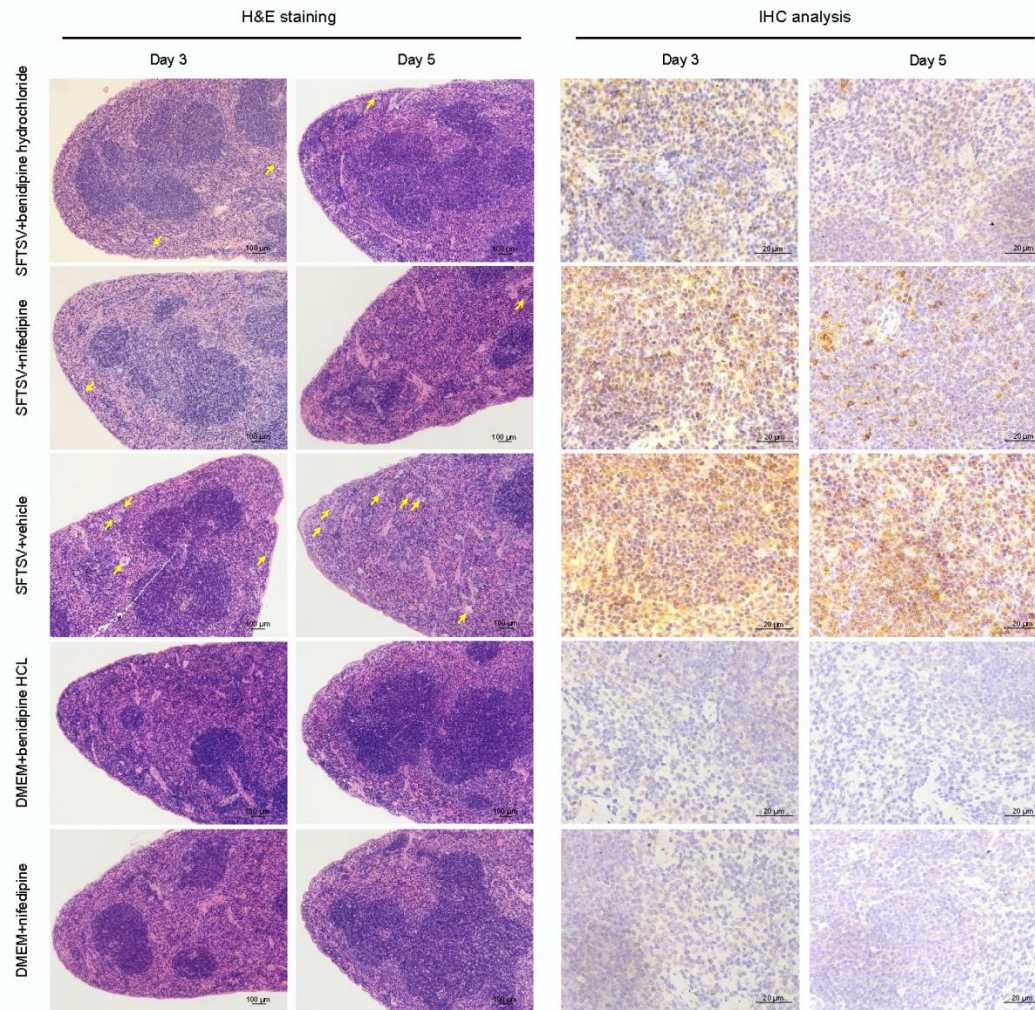

**Fig. S8. Histopathology and immunohistochemistry analysis of SFTSV infected C57BL/6 mouse.** Spleen samples were collected from C57BL/6 mice at days 3 and 5 post infection and used for hematoxylin and eosin (H&E) staining and immunohistochemistry (IHC) analysis. A rabbit polyclonal antibody against SFTSV NP was used as primary antibody of IHC. Yellow arrows indicate the megakaryocytes in spleens.
