# Supplementary material
Source: PubMed Central journal article supplement (PMC6796935)
Supplement: 41422_2019_214_MOESM9_ESM.pdf [file 41422_2019_214_MOESM9_ESM.pdf]

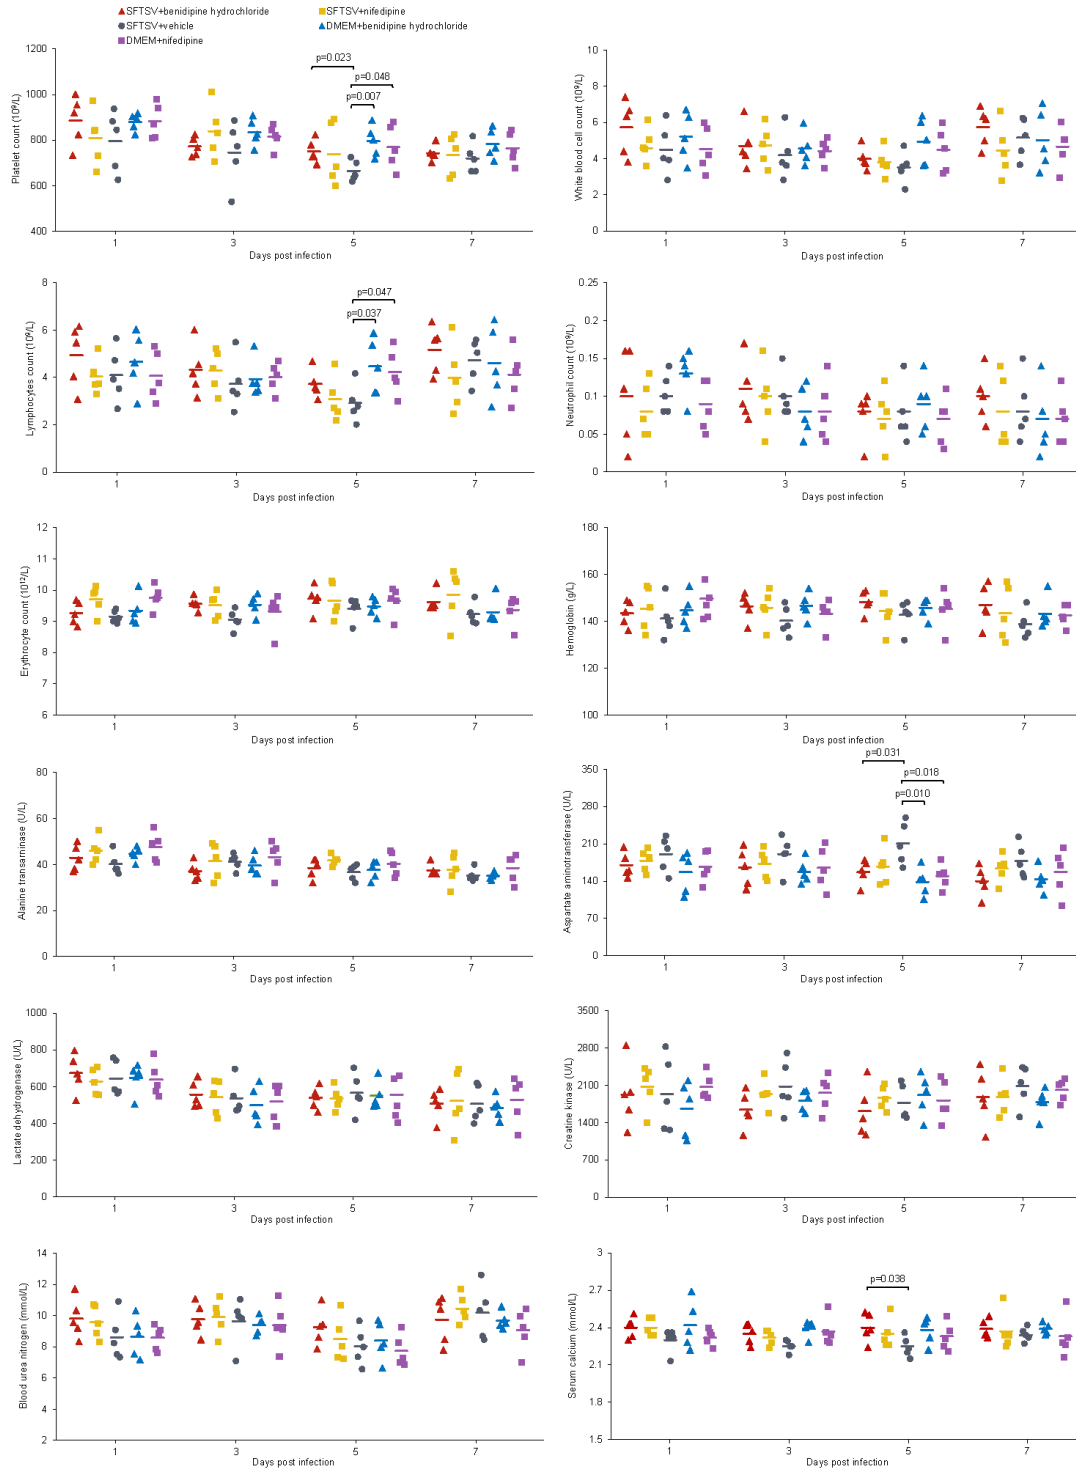

**Fig. S9. Hematological and serum biochemical analysis of SFTSV infected C57BL/6 mouse.** Blood sample was collected from each C57BL/6 mouse and analysed for hemoglobin and counts of platelets, white blood cells, lymphocytes, neutrophils, and erythrocytes. Serum sample was collected from each C57BL/6 mouse

and analysed for alanine aminotransferase, aspartate aminotransferase, lactate dehydrogenase, creatine kinase, blood urea nitrogen, and calcium. The horizontal line indicates mean value. Comparison of these parameters between two groups at each sampling time point was performed by student's *t* test. The *P* value less than 0.05 that indicates statistical significance was shown.
