# Supplementary material
Source: PubMed Central journal article supplement (PMC6796935)
Supplement: 41422_2019_214_MOESM10_ESM.pdf [file 41422_2019_214_MOESM10_ESM.pdf]

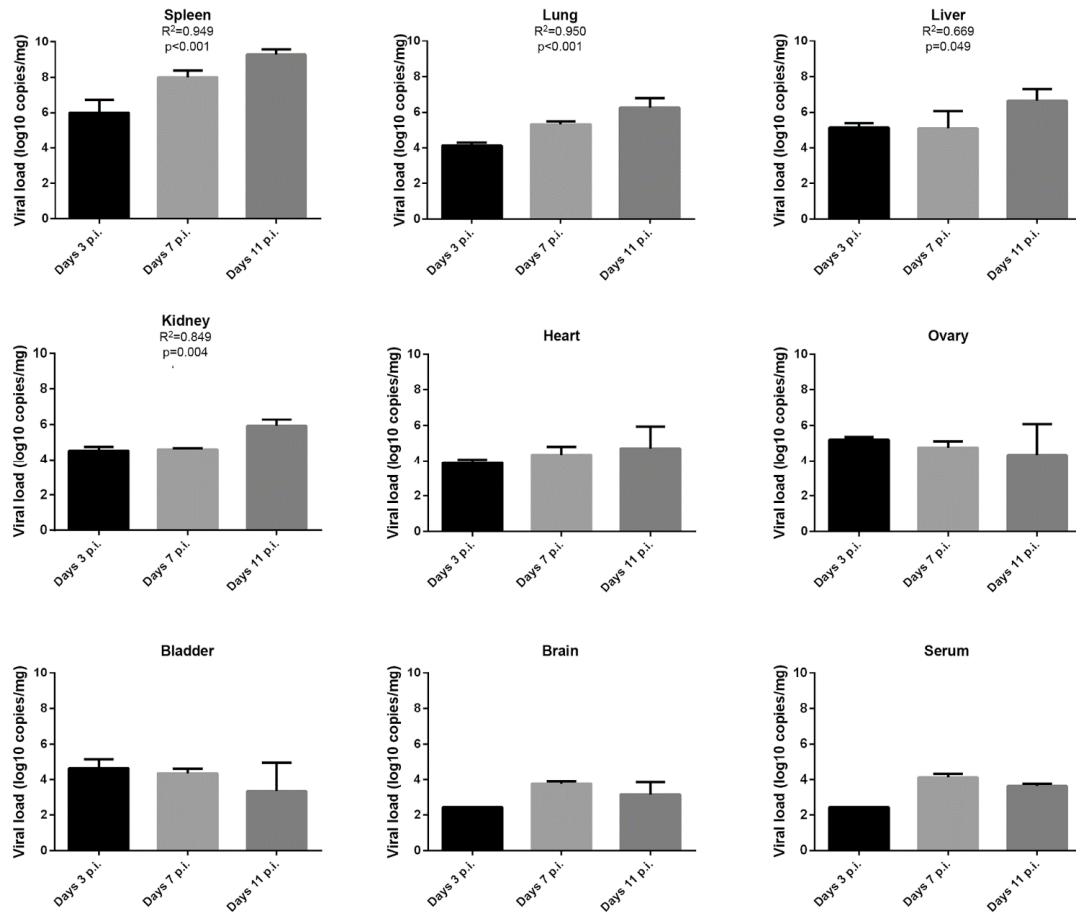

**Fig. S10 Analysis of viral loads in multiple organs of SFTSV-infected humanized mouse.** Viral loads in multiple organs were measured by qRT-PCR at days 3, 7, and 11 post infection (p.i.). The correlation between tissue viral load and days p.i. was analyzed with Pearson model, and the tissues showing significant viral growth over time was indicated with *P* values (< 0.05).
