# Supplementary material
Source: PubMed Central journal article supplement (PMC6796935)
Supplement: 41422_2019_214_MOESM11_ESM.pdf [file 41422_2019_214_MOESM11_ESM.pdf]

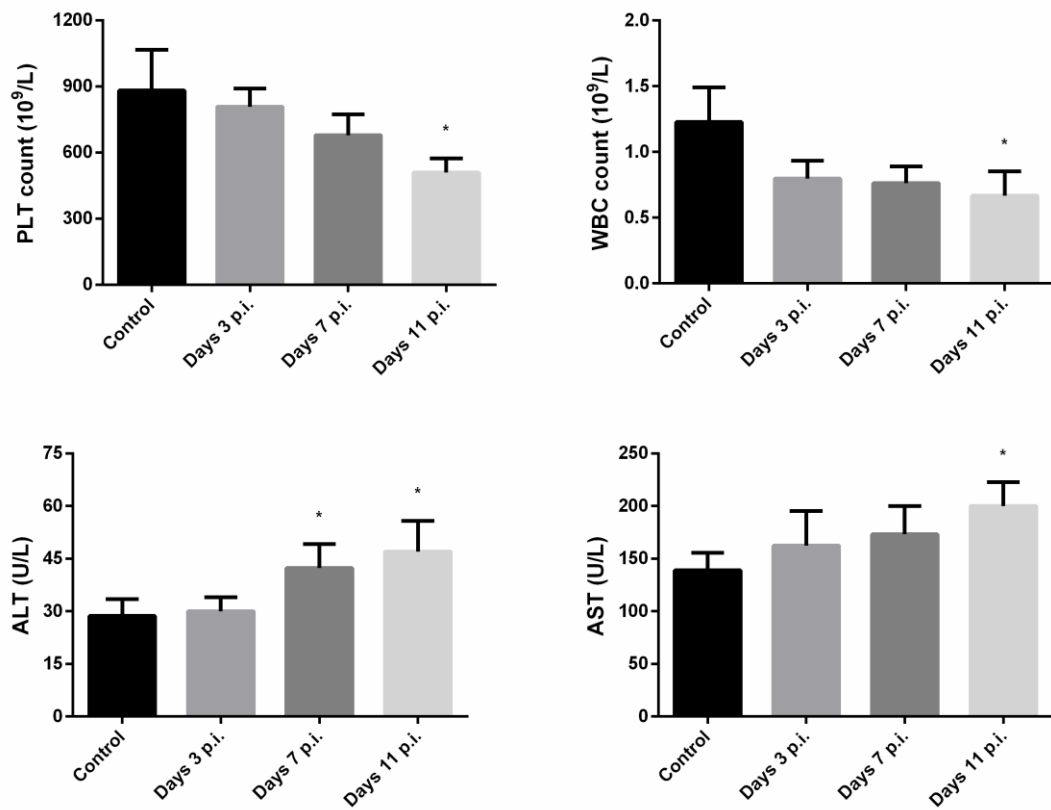

**Fig. S11. Hematological and serum biochemical analysis of SFTSV infected humanized mouse.** Blood sample was collected from each humanized mouse and analysed for hemoglobin and counts of platelets and white blood cells. Serum sample was collected from each humanized mouse and analysed for alanine aminotransferase, and aspartate aminotransferase. Error bars represented standard deviation calculated from three replicates. Statistical analysis of the measurements between SFTSV infected and mock treated mice was analysed with student's *t* test. \* indicates that the *P* value is less than 0.05.
