# Supplementary material
Source: PubMed Central journal article supplement (PMC6796935)
Supplement: 41422_2019_214_MOESM12_ESM.pdf [file 41422_2019_214_MOESM12_ESM.pdf]

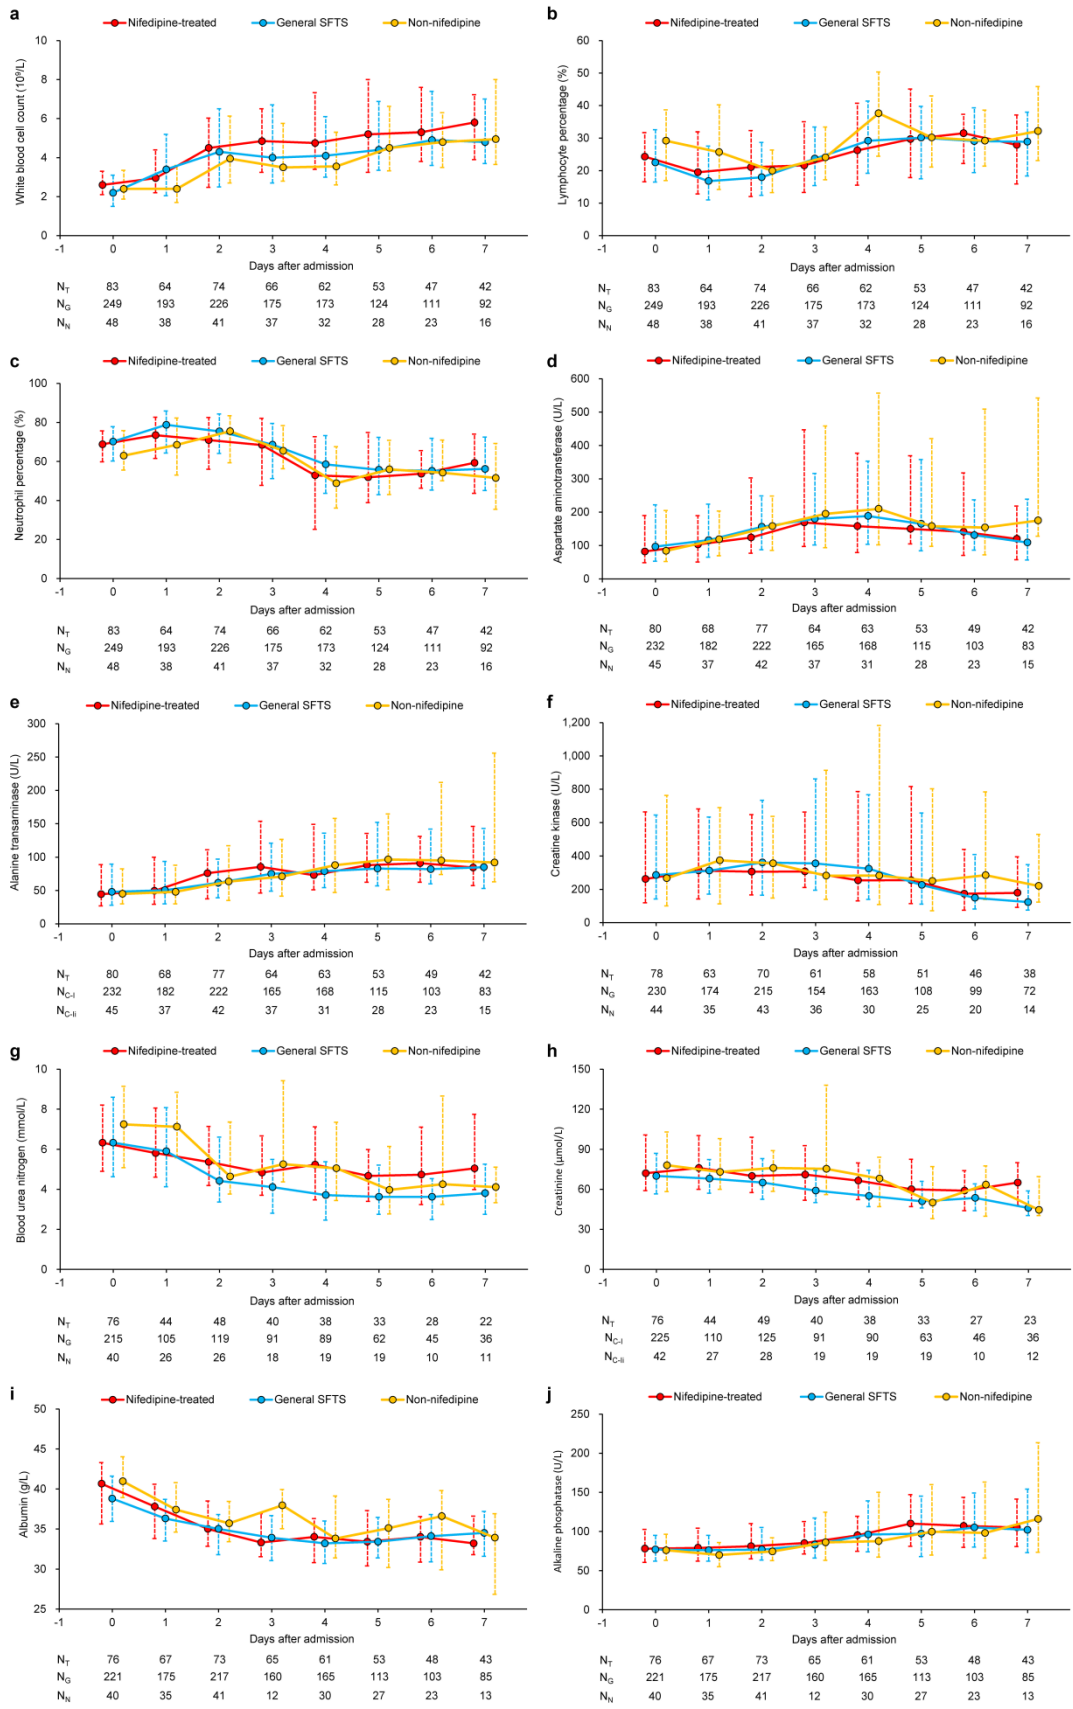

**Fig. S12. Assessment of nifedipine treatment effect on hematological and**

**biochemical parameters in SFTS patients. (a, b, c, d, e, f, g, h, i, and j)** Sequential data on hematological and biochemical parameters tested during whole hospitalization, including white blood cell count (a), lymphocyte percentage (b), neutrophil percentage (c), aspartate aminotransferase (d), alanine transaminase (e), creatine kinase (f), blood urea nitrogen (g), creatinine (h), albumin (i), and alkaline phosphatase (j), were analysed by generalized estimating equation models, with statistical analysis results presented in Supplementary information, Table S7. The circle indicates median value and the dashed line indicates interquartile-range.  $N_T$ , no. of patients in nifedipine-treated group;  $N_G$ , no. of patients in general SFTS group;  $N_N$ , no. of patients in non-nifedipine group.
