# Supplementary material
Source: PubMed Central journal article supplement (PMC6796935)
Supplement: 41422_2019_214_MOESM13_ESM.pdf [file 41422_2019_214_MOESM13_ESM.pdf]

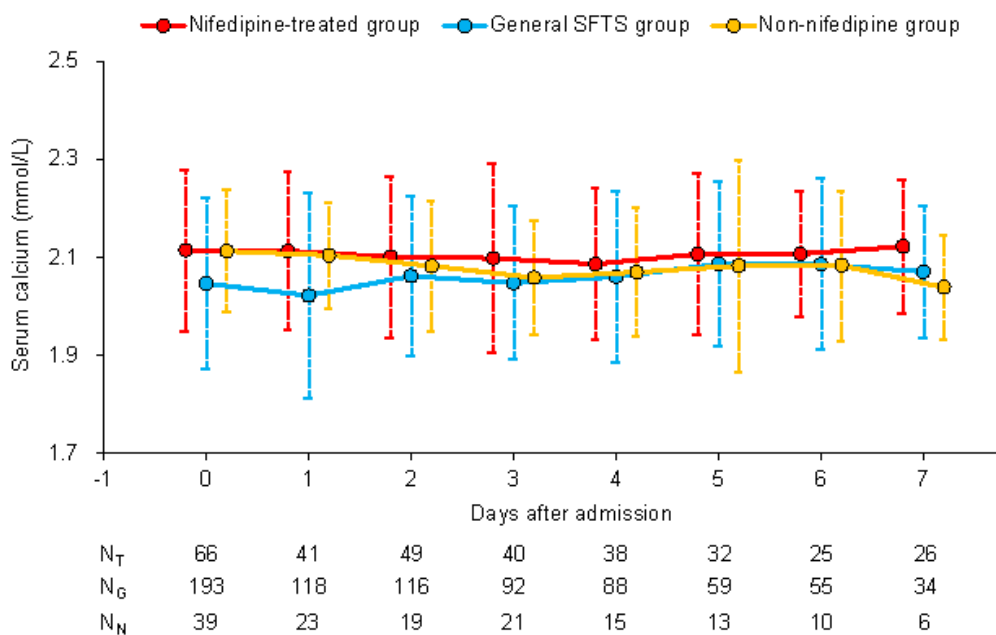

**Fig. S13. Comparison of sequential serum calcium levels in SFTS patients.** The generalized estimating equation model was used to analyse sequentially tested serum calcium levels during whole hospitalization, and the statistical analysis results were presented in Supplementary information, Table S7. The circle indicates mean value and the dashed line indicates standard deviation.  $N_T$ , no. of patients in nifedipine-treated group;  $N_G$ , no. of patients in general SFTS group;  $N_N$ , no. of patients in non-nifedipine group.
