# Supplementary material
Source: PubMed Central journal article supplement (PMC6796935)
Supplement: 41422_2019_214_MOESM14_ESM.pdf [file 41422_2019_214_MOESM14_ESM.pdf]

**Supplementary information, Table S1 Anti-SFTSV activity and cytotoxicity of 14 drugs.**

| Drug name                | Inhibition rate |             | Survive rate |             | Indication             | Target          | Brief Description                                                                                                                                           |
|--------------------------|-----------------|-------------|--------------|-------------|------------------------|-----------------|-------------------------------------------------------------------------------------------------------------------------------------------------------------|
|                          | Replicate 1     | Replicate 2 | Replicate 1  | Replicate 2 |                        |                 |                                                                                                                                                             |
| Apatinib (YN968D1)       | 91.62           | 84.30       | 79.41        | 87.07       | Cancer                 | VEGFR           | Apatinib (YN968D1) is a small-molecule selective multitargeted tyrosine kinase inhibitor with an IC <sub>50</sub> of 2.43 nM for the inhibition of VEGFR2.  |
| Avobenzone (Parsol 1789) | 88.22           | 91.15       | 81.44        | 74.70       |                        |                 | Avobenzone (Parsol 1789) is an oil soluble ingredient used in sunscreen products to absorb the full spectrum of UVA rays and a dibenzoylmethane derivative. |
| Benidipine hydrochloride | 98.09           | 99.03       | 76.54        | 73.87       | Cardiovascular Disease | calcium channel | Benidipine HCl is a hydrochloride salt form of benidipine which is a dihydropyridine calcium channel blocker.                                               |
| Dipyridamole             | 81.44           | 80.61       | 95.63        | 83.13       | Cardiovascular         |                 | Dipyridamole (Permole,                                                                                                                                      |

(Persantine)

Disease

Persantine) is a phosphodiesterase inhibitor that blocks uptake and metabolism of adenosine by erythrocytes and vascular endothelial cells.

Dutasteride

82.41

77.86

71.95

71.85

Endocrinology

5-alpha Reductase

5-alpha-reductase inhibitor

Elvitegravir (GS-9137)

69.42

85.46

79.78

78.24

Immunology

Integrase

Elvitegravir is a human immunodeficiency virus integrase inhibitor with EC<sub>50</sub> of 0.7, 2.8 and 1.4 for HIV-1 IIIB, HIV-2 EHO and HIV-2 ROD.

Fenofibrate (Tricor, Trilipix)

91.40

93.76

72.69

81.43

Cardiovascular Disease

Fenofibrate (Tricor, Trilipix) is a drug of the fibrate class and fibric acid derivative

Lomerizine HCl

91.30

90.12

98.68

84.37

Cardiovascular Disease

calcium channel

Lomerizine dihydrochloride is a relatively new L- and T-type calcium channel blocker used in the treatment of migraine.

|                                    |       |       |       |        |                   |                               |                                                                                                                                                                                                      |
|------------------------------------|-------|-------|-------|--------|-------------------|-------------------------------|------------------------------------------------------------------------------------------------------------------------------------------------------------------------------------------------------|
| Mifepristone (Mifeprex)            | 73.35 | 86.04 | 75.18 | 70.39  | Metabolic Disease | Estrogen/progestogen Receptor | Mifepristone (Mifeprex, RU-486, RU-38486, Mifegyne) is a remarkably active antagonist of progesterone receptor and glucocorticoid receptor with IC <sub>50</sub> of 0.2 nM and 2.6 nM, respectively. |
| Mycophenolic acid* (Mycophenolate) | 86.54 | 80.52 | 88.28 | 129.34 | Infection         |                               | Mycophenolic acid (Mycophenolate) is an immunosuppressant drug used to prevent rejection in organ transplantation.                                                                                   |
| Progesterone (Prometrium)          | 78.81 | 78.99 | 87.53 | 88.53  | Endocrinology     |                               | Progesterone (Prometrium) is a C-21 steroid hormone.                                                                                                                                                 |
| Terbinafine (Lamisil, Terbinex)    | 91.93 | 91.46 | 72.82 | 78.40  | Infection         |                               | Terbinafine (Lamisil, Terbinex) is used to treat infections caused by a fungus. It works by killing the fungus or preventing its growth.                                                             |
| Tolnaftate                         | 81.84 | 83.48 | 70.73 | 92.45  | Cancer            |                               | Tolnaftate is a synthetic thiocarbamate used as an                                                                                                                                                   |

|                 |       |       |        |        |               |                                                                                                                                                                   |
|-----------------|-------|-------|--------|--------|---------------|-------------------------------------------------------------------------------------------------------------------------------------------------------------------|
| Triclabendazole | 77.45 | 81.84 | 76.62  | 70.43  | Vermifuge     | anti-fungal agent.<br>Triclabendazole is a benzimidazole, it binds to tubulin impairing intracellular transport mechanisms and interferes with protein synthesis. |
| Vitamin D2      | 82.40 | 86.72 | 101.91 | 103.60 | Endocrinology | Vitamin D2 is a selective inhibitor of mammalian DNA polymerase A (pol A) with IC <sub>50</sub> of 123 mM.                                                        |

---

\*Mycophenolic acid (MPA) is a positive control of anti-SFTSV compound.
