# Supplementary material
Source: PubMed Central journal article supplement (PMC6796935)
Supplement: 41422_2019_214_MOESM15_ESM.pdf [file 41422_2019_214_MOESM15_ESM.pdf]

**Supplementary information, Table S2 Comparisons of clinical manifestations presenting before or at admission in nifedipine-treated group with those in general SFTS group or non-nifedipine group.**

|                                             | Nifedipine-treated group (n=83) | General SFTS group (n=249) | Non-nifedipine group (n=48) | <i>P</i> <sup>a</sup> | <i>P</i> <sup>b</sup> |
|---------------------------------------------|---------------------------------|----------------------------|-----------------------------|-----------------------|-----------------------|
| Age, years                                  | 64.5 ± 8.7                      | 64.9 ± 10.4                | 62.6 ± 8.9                  | 0.803                 | 0.227                 |
| Sex, female                                 | 57 (68.7)                       | 171 (68.7)                 | 35 (72.9)                   | 1.000                 | 0.609                 |
| Delay from symptom onset to admission, days | 5 (4-6)                         | 5 (4-6)                    | 5 (4-7)                     | 0.805                 | 0.684                 |
| Fever                                       | 83 (100)                        | 249 (100)                  | 48 (100)                    | 1.000                 | 1.000                 |
| Feeble                                      | 81 (97.6)                       | 241 (96.8)                 | 46 (95.8)                   | 1.000                 | 0.624                 |
| Dizzy                                       | 7 (8.4)                         | 29 (11.6)                  | 3 (6.3)                     | 0.542                 | 0.745                 |
| Headache                                    | 6 (7.2)                         | 19 (7.6)                   | 2 (4.2)                     | 0.904                 | 0.710                 |
| Chills                                      | 2 (2.4)                         | 14 (5.6)                   | 0                           | 0.237                 | 0.532                 |
| Myalgias                                    | 53 (63.9)                       | 154 (61.8)                 | 29 (60.4)                   | 0.744                 | 0.695                 |
| Arthralgia                                  | 0                               | 2 (0.8)                    | 0                           | 1.000                 | 1.000                 |
| Lymphadenopathy                             | 42 (50.6)                       | 114 (45.8)                 | 25 (52.1)                   | 0.446                 | 0.870                 |
| Cough                                       | 16 (19.3)                       | 33 (13.3)                  | 5 (10.4)                    | 0.180                 | 0.183                 |
| Sputum                                      | 9 (10.8)                        | 14 (5.6)                   | 2 (4.2)                     | 0.105                 | 0.184                 |
| Anorexia                                    | 72 (86.7)                       | 205 (82.3)                 | 38 (79.2)                   | 0.310                 | 0.255                 |
| Nausea                                      | 46 (55.4)                       | 126 (50.6)                 | 22 (45.8)                   | 0.447                 | 0.290                 |
| Vomit                                       | 12 (14.5)                       | 40 (16.4)                  | 7 (14.6)                    | 0.727                 | 0.984                 |
| Abdominal pain                              | 3 (3.6)                         | 9 (3.6)                    | 1 (2.1)                     | 1.000                 | 1.000                 |

|                                 |           |           |           |       |       |
|---------------------------------|-----------|-----------|-----------|-------|-------|
| Diarrhea                        | 12 (14.5) | 49 (19.7) | 13 (27.1) | 0.287 | 0.076 |
| Ecchymosis at venipuncture site | 8 (9.6)   | 25 (10)   | 3 (6.3)   | 0.916 | 0.745 |
| Gingival bleeding               | 0         | 1 (0.4)   | 0         | 1.000 | -     |
| Melena                          | 0         | 3 (1.2)   | 0         | 0.576 | -     |
| Petechia                        | 0         | 0         | 1 (2.1)   | -     | 1.000 |
| Hematemesis                     | 1 (1.2)   | 1 (0.4)   | 0         | 0.438 | 1.000 |
| Convulsion                      | 2 (2.4)   | 4 (1.6)   | 3 (6.3)   | 0.642 | 0.139 |
| Dysphoria                       | 2 (2.4)   | 5 (2.0)   | 0         | 1.000 | 1.000 |
| Confusion                       | 2 (2.4)   | 9 (3.6)   | 3 (6.3)   | 0.737 | 0.355 |
| Lethargy                        | 1 (1.2)   | 3 (1.2)   | 1 (2.1)   | 1.000 | 1.000 |
| Coma                            | 0         | 4 (1.6)   | 1 (2.1)   | 0.576 | 1.000 |

<sup>a</sup>indicates difference between nifedipine-treated group and general SFTS group;

<sup>b</sup>indicates difference between nifedipine-treated group and non-nifedipine group.
