# Supplementary material
Source: PubMed Central journal article supplement (PMC6796935)
Supplement: 41422_2019_214_MOESM16_ESM.pdf [file 41422_2019_214_MOESM16_ESM.pdf]

**Supplementary information, Table S3 Comparisons of the viral loads tested at admission in nifedipine-treated group with those in general SFTS group or in non-nifedipine group.**

|                                                           | Nifedipine-treated group (n=83) | General SFTS group (n=249) | Non-nifedipine group (n=48) | <i>P</i> <sup>a</sup> | <i>P</i> <sup>b</sup> |
|-----------------------------------------------------------|---------------------------------|----------------------------|-----------------------------|-----------------------|-----------------------|
| Viral load, log <sub>10</sub> copies/ml                   | 6.58 ± 1.11                     | 6.79 ± 1.13                | 6.74 ± 1.03                 | 0.182                 | 0.447                 |
| Stratification of viral load, log <sub>10</sub> copies/mL |                                 |                            |                             |                       |                       |
| <6                                                        | 26 (38.8)                       | 50 (27.6)                  | 10 (25.6)                   | 0.090                 | 0.168                 |
| ≥6                                                        | 41 (61.2)                       | 131 (72.4)                 | 29 (74.4)                   |                       |                       |

<sup>a</sup>indicates difference between nifedipine-treated group and general SFTS group;

<sup>b</sup>indicates difference between nifedipine-treated group and non-nifedipine group.
