# Supplementary material
Source: PubMed Central journal article supplement (PMC6796935)
Supplement: 41422_2019_214_MOESM17_ESM.pdf [file 41422_2019_214_MOESM17_ESM.pdf]

**Supplementary information, Table S4 Comparisons of laboratory test results that were obtained at admission in nifedipine-treated group with those in general SFTS group or non-nifedipine group.**

|                                              | Normal range | Nifedipine-treated group (n=83) | General SFTS group (n=249) | Non-nifedipine group (n=48) | <i>P</i> <sup>a</sup> | <i>P</i> <sup>b</sup> |
|----------------------------------------------|--------------|---------------------------------|----------------------------|-----------------------------|-----------------------|-----------------------|
| Platelet count, × 10 <sup>9</sup> /L         | 100-300      | 68 (50-86)                      | 66 (48-86)                 | 66 (52-91)                  | 0.932                 | 0.538                 |
| White blood cell count, × 10 <sup>9</sup> /L | 4.0-10.0     | 2.6 (2.1-3.3)                   | 2.2 (1.5-3.1)              | 2.4 (1.9-3.4)               | 0.011                 | 0.396                 |
| Lymphocyte percentage, %                     | 20.0-40.0    | 24.3 (16.6-31.7)                | 22.5 (16.5-32.6)           | 29.2 (17.0-38.7)            | 0.537                 | 0.150                 |
| Neutrophil percentage, %                     | 50.0-70.0    | 68.8 (59.8-75.7)                | 70.2 (60.2-77.9)           | 63.0 (55.6-75.9)            | 0.548                 | 0.217                 |
| Red blood cell count, × 10 <sup>12</sup> /L  | 3.5-5.5      | 4.3 ± 0.6                       | 4.2 ± 0.6                  | 4.3 ± 0.6                   | 0.028                 | 0.759                 |
| Aspartate aminotransferase, U/L              | 0-40         | 82 (49-190)                     | 96.5 (53-222)              | 84 (53-205)                 | 0.251                 | 0.561                 |
| Alanine transaminase, U/L                    | 0-40         | 45 (27-89)                      | 48 (28-90)                 | 45 (30-83)                  | 0.776                 | 0.892                 |
| Creatine kinase, U/L                         | 25-200       | 262 (119-664)                   | 286 (143-634)              | 267 (101-763)               | 0.481                 | 0.900                 |
| Lactate dehydrogenase, U/L                   | 109-245      | 338 (271-681)                   | 400 (286-699)              | 421 (281-678)               | 0.247                 | 0.457                 |
| Alkaline phosphatase, U/L                    | 40-150       | 78 (61-103)                     | 77 (62-95)                 | 76 (63-96)                  | 0.577                 | 0.335                 |
| Amylase, U/L                                 | 25-115       | 95 (62-148)                     | 90 (71-121)                | 96 (56-147)                 | 0.864                 | 0.797                 |
| Albumin, g/L                                 | 35.0-55.0    | 39.7 ± 5.5                      | 38.8 ± 4.4                 | 41.2 ± 4.2                  | 0.192                 | 0.106                 |
| Total bilirubin, μmol/L                      | 5.1-17.1     | 9.9 ± 3.4                       | 10.2 ± 4.4                 | 9.7 ± 4.0                   | 0.581                 | 0.727                 |
| Blood urea nitrogen, mmol/L                  | 1.4-7.1      | 6.3 (4.9-8.2)                   | 6.3 (4.6-8.6)              | 7.2 (5.1-9.1)               | 0.687                 | 0.323                 |
| Creatinine, μmol/L                           | 40-97        | 72 (59-101)                     | 70 (57-87)                 | 78 (58-103)                 | 0.249                 | 0.496                 |
| Calcium, mmol/L                              | 2.1-2.7      | 2.11 ± 0.16                     | 2.05±0.17                  | 2.11±0.12                   | 0.006                 | 0.950                 |

<sup>a</sup>indicates difference between nifedipine-treated group and general SFTS group;

<sup>b</sup>indicates difference between nifedipine-treated group and non-nifedipine group.
