# Supplementary material
Source: PubMed Central journal article supplement (PMC6796935)
Supplement: 41422_2019_214_MOESM18_ESM.pdf [file 41422_2019_214_MOESM18_ESM.pdf]

**Supplementary information, Table S5 Comparisons of therapies administration during hospitalization in nifedipine-treated group with those in general SFTS group or non-nifedipine group.**

|                                                         | Nifedipine-treated group (n=83) | General SFTS group (n=249) | Non-nifedipine group (n=48) | <i>P</i> <sup>a</sup> | <i>P</i> <sup>b</sup> |
|---------------------------------------------------------|---------------------------------|----------------------------|-----------------------------|-----------------------|-----------------------|
| Recombinant human granulocyte colony-stimulating factor | 61 (73.5)                       | 194 (77.9)                 | 35 (72.9)                   | 0.409                 | 0.943                 |
| XueBiJing*                                              | 53 (63.9)                       | 174 (69.9)                 | 38 (79.2)                   | 0.307                 | 0.067                 |
| Immunoglobulin                                          | 53 (63.9)                       | 139 (55.8)                 | 24 (50.0)                   | 0.199                 | 0.121                 |
| Ribavirin                                               | 38 (45.8)                       | 118 (47.4)                 | 19(39.6)                    | 0.800                 | 0.490                 |
| Corticosteroid                                          | 27 (32.5)                       | 69 (27.7)                  | 18 (37.5)                   | 0.402                 | 0.564                 |
| Thrombopoietin                                          | 24 (28.9)                       | 70 (28.1)                  | 10 (20.8)                   | 0.888                 | 0.309                 |
| Platelets transfusion                                   | 33 (39.8)                       | 97 (39.0)                  | 22 (45.8)                   | 0.897                 | 0.497                 |
| Plasma transfusion                                      | 37 (44.6)                       | 86 (34.5)                  | 16 (33.3)                   | 0.101                 | 0.206                 |

\* a traditional Chinese medicine for treating sepsis;

<sup>a</sup>indicates difference between nefidipine-treated group and general SFTS group;

<sup>b</sup>indicates difference between nefidipine-treated group and non-nifedipine group.
