# Supplementary material
Source: PubMed Central journal article supplement (PMC6796935)
Supplement: 41422_2019_214_MOESM19_ESM.pdf [file 41422_2019_214_MOESM19_ESM.pdf]

**Supplementary information, Table S6 Comparisons of the case fatality rates tested at admission in nifedipine-treated group with those in general SFTS group or in non-nifedipine group.**

|                                                                                       | Nifedipine-treated group (n=83) | General SFTS group (n=249) | Non-nifedipine group (n=48) | <i>P</i> <sup>a</sup> | <i>P</i> <sup>b</sup> |
|---------------------------------------------------------------------------------------|---------------------------------|----------------------------|-----------------------------|-----------------------|-----------------------|
| Case fatality rate, %                                                                 | 3 (3.6)                         | 49 (19.7)                  | 10 (20.8)                   | <0.001                | <0.001                |
| Case fatality rate based on stratification of viral load, log <sub>10</sub> copies/ml |                                 |                            |                             |                       |                       |
| <6                                                                                    | 1/26 (3.8)                      | 2/50 (4.0)                 | 0/10 (0)                    | 1.000                 | 1.000                 |
| ≥6                                                                                    | 1/41 (2.4)                      | 38/131 (29.0)              | 10/29 (34.5)                | <0.001                | <0.001                |

<sup>a</sup>indicates difference between nifedipine-treated group and general SFTS group;

<sup>b</sup>indicates difference between nifedipine-treated group and non-nifedipine group.
