# Supplementary material
Source: PubMed Central journal article supplement (PMC6796935)
Supplement: 41422_2019_214_MOESM20_ESM.pdf [file 41422_2019_214_MOESM20_ESM.pdf]

**Supplementary information, Table S7 Analyses of nifedipine treatment on viral load and laboratory parameters by generalized estimating equation models.**

|                            | Nifedipine-treated group<br>vs. General SFTS group |          | Nifedipine-treated group<br>vs. Non-nifedipine group |          |
|----------------------------|----------------------------------------------------|----------|------------------------------------------------------|----------|
|                            | $\beta$ (95% CI)                                   | <i>P</i> | $\beta$ (95% CI)                                     | <i>P</i> |
| Viral load                 | -0.548 (-0.842 to -0.254)                          | <0.001   | -0.586 (-0.994 to -0.179)                            | 0.005    |
| Platelet count             | 7.000 (1.079 to 12.921)                            | 0.020    | 7.116 (-2.167 to 16.399)                             | 0.133    |
| Lactate dehydrogenase      | -57.770 (-143.711 to 28.171)                       | 0.188    | -155.296 (-279.958 to -30.635)                       | 0.015    |
| White blood cell count     | 0.235 (-0.171 to 0.641)                            | 0.256    | 0.514 (-0.001 to 1.028)                              | 0.050    |
| Lymphocyte percentage      | 0.709 (-1.452 to 2.871)                            | 0.520    | -2.260 (-5.380 to 0.860)                             | 0.156    |
| Neutrophil percentage      | -1.595 (-4.260 to 1.070)                           | 0.241    | 1.560 (-2.319 to 5.438)                              | 0.431    |
| Aspartate aminotransferase | -11.363 (-63.656 to 40.929)                        | 0.670    | -76.097 (-169.572 to 17.378)                         | 0.111    |
| Alanine transaminase       | 4.871 (-14.981 to 24.722)                          | 0.631    | -8.611 (-42.668 to 25.445)                           | 0.620    |
| Creatine kinase            | -87.977 (-216.953 to 40.100)                       | 0.181    | -199.435 (-444.609 to 45.739)                        | 0.111    |
| Blood urea nitrogen        | 0.017 (-0.795 to 0.830)                            | 0.967    | 0.927 (-2.268 to 0.414)                              | 0.175    |
| Creatinine                 | 0.274 (-9.151 to 9.698)                            | 0.955    | -10.657 (-24.197 to 2.883)                           | 0.123    |
| Albumin                    | 0.454 (-0.363 to 1.270)                            | 0.276    | -0.875 (-2.169 to 0.420)                             | 0.185    |
| Calcium                    | 0.060 (0.025 to 0.096)                             | 0.001    | 0.031 (-0.016 to 0.078)                              | 0.198    |
