# Supplementary material
Source: PubMed Central journal article supplement (PMC6796935)

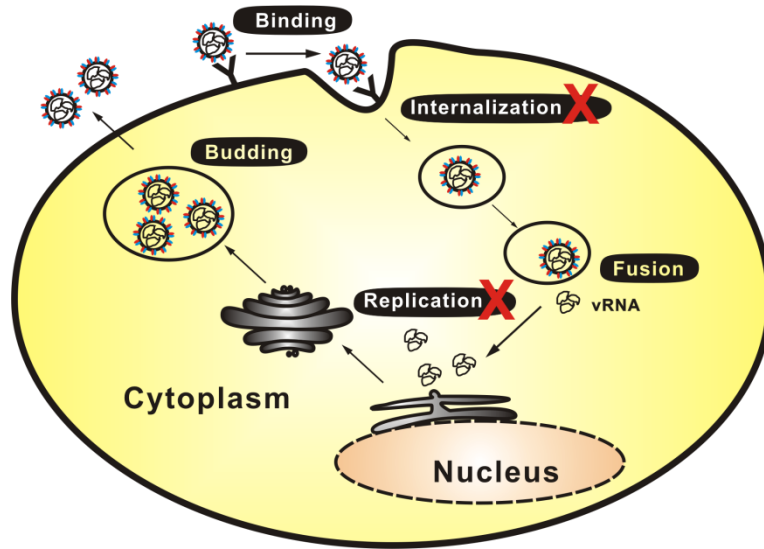

**Fig. S1. A proposed model for the anti-SFTSV activity of calcium channel blockers.**

Supplement: 41422_2019_214_MOESM1_ESM.pdf [file 41422_2019_214_MOESM1_ESM.pdf]
